# Supplementary material
Source: PubMed Central journal article supplement (PMC8053000)
Supplement: AET2-5-e10511-s001.pdf [file AET2-5-e10511-s001.pdf]

## Data Supplement S1: Study Survey Instrument

1. What is your role in the residency program? (If you are not the program director, please email this survey to the Emergency Medicine Program Director for your program).

- Program Director

2. Please indicate what region of the country your program is listed in:

- Midwest - IA, IL, IN, KS, MI, MN, MO, ND, NE, OH, SD, WI
- Northeast - CT, DC, DE, MA, MD, ME, NH, NJ, NY, PA, RI, VT
- Southeast - AL, AR, FL, GA, KY, LA, MS, NC, SC, TN, VA, WV, Puerto Rico
- Southwest - AZ, NM, OK, TX
- West - AK, CA, CO, HI, ID, MT, NV, OR, UT, WA, WY

3. What is the metropolitan size that your program is located in?

- <100,000
- 100,00 - 250,000
- 250,000 -1 million
- >1 million

4. How many Emergency Medicine Residents do you have in your program? (open-ended)

5. How would you describe your practice setting? (Please select all that apply)

- University-based
- Public-hospital-based
- Community-hospital-based
- Military-hospital-based
- Other (open-ended)

Please use the following definition of disability when answering the following questions.

Definition of Disability - Americans with Disabilities Act (ADA)

An individual with a disability is defined in the act as someone who has **"a physical or mental impairment that substantially limits one or more major life activities; has a record of such an impairment; or is regarded as having such an impairment."**

The current conception of disability supported by the ADA Amendments Act comprises a **broad range of disabilities: physical, sensory, learning, intellectual, mental/psychological, and chronic health conditions.**

6. Has your program ever presented educational programming focused **specifically** on the care of persons with disabilities?

- Yes
- No

(If yes to 6) 7. What topics related to the care of persons with disabilities did you cover? (open-ended response)

(If yes to 6) 8. What methods of instruction did you use for specific educational interventions on the care of persons with disabilities? (Please check all that apply)

- Didactic lectures
- Journal club
- Simulation
- Case-Based Learning
- Asynchronous learning
- Bedside Teaching
- Other

(If yes to 6) 9. Approximately how many hours of specific educational interventions on the care of persons with disabilities do you have in your current curriculum? (open-ended question)

10. In addition to specific dedicated educational interventions, has your program incorporated education about the care of persons with disabilities into **general lecture topics** where patients with disabilities are disproportionately affected?

- Yes
- No

11. In your opinion, how many hours should be devoted to education about the care of persons with disabilities in your curriculum? (open-ended)

12. Please list any barriers you have encountered in integrating topics on the care of persons with disabilities into your curriculum?

- N/A
- Lack of Interested Faculty
- Lack of Funding
- Lack of Resources
- Lack of Expertise
- Lack of Time
- Lack of Need
- Other

13. Does your residency program offer accommodations to residents who identify as having a disability?

- Yes
- No
- I don't know

14. Do you routinely ask residents who match at your program whether they need accommodations?

- Yes
- No
- I don't know

15. If the resident requests an accommodation, do you know who is responsible for arranging that accommodation?

- Yes
- No

16. Do you have any faculty in your residency program who identify as having a disability?

- Yes
- No
- Not that I'm aware of

(If yes to 16) 17. How many emergency medicine faculty in your program identify with a disability? (open-ended question)

18. Do you have any residents in your residency program who identify as having a disability?

- Yes
- No
- Not that I'm aware of

(If yes to 18) 19. How many emergency residents in your program identify with a disability? (open-ended question)

20. State your level of confidence in providing accommodations for a resident with the following disabilities between Match Day and July 1 if such a resident were to match in your program

|                                                 | Not confident at all (1) | Slightly Confident (2) | Somewhat Confident (3) | Moderately confident (4) | Very confident (5)    |
|-------------------------------------------------|--------------------------|------------------------|------------------------|--------------------------|-----------------------|
| Attention deficit/hyperactivity disorder (ADHD) | <input type="radio"/>    | <input type="radio"/>  | <input type="radio"/>  | <input type="radio"/>    | <input type="radio"/> |
| Learning Disability                             | <input type="radio"/>    | <input type="radio"/>  | <input type="radio"/>  | <input type="radio"/>    | <input type="radio"/> |
| Psychological Disability                        | <input type="radio"/>    | <input type="radio"/>  | <input type="radio"/>  | <input type="radio"/>    | <input type="radio"/> |
| Deaf and hard of hearing                        | <input type="radio"/>    | <input type="radio"/>  | <input type="radio"/>  | <input type="radio"/>    | <input type="radio"/> |

|                          |                       |                       |                       |                       |                       |
|--------------------------|-----------------------|-----------------------|-----------------------|-----------------------|-----------------------|
| Visual impairment        | <input type="radio"/> |
| Mobility disability      | <input type="radio"/> |
| Chronic health condition | <input type="radio"/> |

21. Please state your level of agreement with the following statement: My institution would be supportive of accommodating a resident with a disability.

- Strongly Agree
- Agree
- Neutral
- Disagree
- Strongly Disagree
